# Supplementary material for: Hepatic glycogen storage diseases are associated to microbial dysbiosis
Source: PubMed Central journal article supplement (PMC6445422; doi:10.1371/journal.pone.0214582), 2019-04-02
Supplement: pone.0214582.s001.pdf [file pone.0214582.s001.pdf]

**S1 Table. Differences in nutrient mean daily intake between healthy controls and GSD patients and their effect on microbial communities.**

| Nutrients                                 | Daily intake<br>Median (Q1-Q3) |                           | p-value <sup>1</sup> | Microbial community<br>difference between<br>treatments<br>(r <sup>2</sup> ; p-value) <sup>2</sup> |
|-------------------------------------------|--------------------------------|---------------------------|----------------------|----------------------------------------------------------------------------------------------------|
|                                           | Patients (n=24)                | Control (n=16)            |                      |                                                                                                    |
| <b>Macronutrients</b>                     |                                |                           |                      |                                                                                                    |
| Total Calories (kcal total)               | 2233.83 (1988.16-2867.16)      | 1520.33 (1143.08-1836.91) | <b>0.001</b>         | 0.045; 0.017                                                                                       |
| Total Carbohydrate (kcal)                 | 1590.00 (1383.91-2011.00)      | 747.00 (577.33-827.99)    | <b>0.001</b>         | 0.051; 0.006                                                                                       |
| %Kcal total from carbohydrate             | 71.66 (67.66-75.25)            | 49.33 (35.5-55.33)        | <b>0.001</b>         | 0.046; 0.018                                                                                       |
| Total carbohydrate (g)                    | 389.16 (355.00-496.33)         | 188.66 (154.08-218.58)    | <b>0.001</b>         | 0.051; 0.008                                                                                       |
| * Diet carbohydrate (kcal)                | 396.55 (240.16-590.53)         | 747.00 (577.33-827.99)    | <b>0.001</b>         | 0.031; 0.159                                                                                       |
| * Diet carbohydrate (g)                   | 97.33 (58.95-147.50)           | 188.66(154.08-218.58)     | <b>0.001</b>         | 0.033; 0.118                                                                                       |
| * Uncooked cornstarch (kcal)              | 1250.33 (970.19-1494.74)       | 0.00                      | <b>0.001</b>         | 0.053; 0.004                                                                                       |
| * Uncooked cornstarch<br>carbohydrate (g) | 309.50 (239.58-368.00)         | 0.00                      | <b>0.001</b>         | 0.054; 0.002                                                                                       |
| Total simple sugars (g)                   | 12.33 (4.25-24.66)             | 78.33 (47.66-91.41)       | <b>0.001</b>         | 0.040; 0.051                                                                                       |
| Fiber (g)                                 | 12.33 (10.66-16.91)            | 13.00 (5.75-20.25)        | 0.868                | 0.025; 0.480                                                                                       |
| Total fat (kcal)                          | 377.66 (260.41-459.41)         | 544.83 (367.83-581.91)    | <b>0.008</b>         | 0.030; 0.204                                                                                       |
| % Kcal total from fat                     | 14.66 (10.91-19.66)            | 34.66 (28.78-38.83)       | <b>0.001</b>         | 0.049; 0.007                                                                                       |
| Fat (g)                                   | 40.00 (27.83-48.91)            | 58.16 (38.66-62.41)       | <b>0.007</b>         | 0.031; 0.190                                                                                       |
| Saturated fat (g)                         | 10.33 (7.75-15.41)             | 22.00 (14.33-24.91)       | <b>0.001</b>         | 0.039; 0.049                                                                                       |
| Monounsaturated fat (g)                   | 13.33 (8.41-19.08)             | 16.16 (12.83-20.83)       | 0.269                | 0.032; 0.174                                                                                       |
| Polyunsaturated fat (g)                   | 6.16 (3.91-10.00)              | 7.33 (5.08-10.58)         | 0.415                | 0.018; 0.884                                                                                       |
| Protein (kcal)                            | 299.33 (238.33-339.91)         | 254.16 (218.16-365.00)    | 0.307                | 0.023; 0.609                                                                                       |
| %Kcal total from protein                  | 13.50 (10.75-14.66)            | 19.00 (16.08-25.16)       | <b>0.001</b>         | 0.033; 0.116                                                                                       |
| Protein (g)                               | 71.33 (57.25-79.91)            | 61.16 (52.41-88.33)       | 0.314                | 0.023; 0.586                                                                                       |

| <b>Minerals</b>       |                           |                           |              |              |
|-----------------------|---------------------------|---------------------------|--------------|--------------|
| Calcium               | 206.00 (133.66-306.50)    | 650.16 (382.33-722.83)    | <b>0.001</b> | 0.033; 0.117 |
| Iron                  | 11.00 (8.91-14.41)        | 9.33 (7.33-15.08)         | 0.369        | 0.024; 0.498 |
| Magnesium             | 175.00 (122.58-210.00)    | 193.16 (114.74-242.00)    | 0.619        | 0.024; 0.529 |
| Manganese             | 1.50 (1.00-2.00)          | 1.83 (1.08-2.25)          | 0.426        | 0.021; 0.721 |
| Phosphorus            | 773.66 (633.16-1001.83)   | 847.66 (617.41-1088.66)   | 0.649        | 0.024; 0.489 |
| Potassium             | 1492.50 (1084.66-1878.24) | 1809.66 (1191.08-2155.66) | 0.320        | 0.024; 0.473 |
| Selenium              | 81.50 (76.16-93.33)       | 61.83 (49.25-108.50)      | 0.143        | 0.033; 0.138 |
| Sodium                | 1168.33 (651.99-1765.41)  | 1702.33 (1305.99-2160.74) | <b>0.034</b> | 0.037; 0.084 |
| Zinc                  | 9.33 (8.00-10.66)         | 8.16 (6.00-10.75)         | 0.139        | 0.030; 0.221 |
| Chromium              | 0.00                      | 0.00                      | -            | -            |
| Copper                | 1.00 (1.00-1.25)          | 1.00 (0.66-1.00)          | 0.068        | 0.035; 0.043 |
| <b>Vitamins</b>       |                           |                           |              |              |
| Vit-A (UI)            | 945.00 (426.50-2758.58)   | 1297.33 (874.16-5250.16)  | 0.060        | 0.021; 0.757 |
| Vit-B1 (mg)           | 1.00 (0.66-1.00)          | 1.00 (0.75-1.33)          | 0.222        | 0.026; 0.371 |
| Vit-B2 (mg)           | 1.00 *                    | 1.00 (0.75-1.58)          | 0.282        | 0.034; 0.097 |
| Vit-B3 (mg)           | 16.33 (12.66-19.83)       | 11.33 (10.00-16.58)       | <b>0.045</b> | 0.025; 0.452 |
| Vit-B5 (mg)           | 2.83 (2.33-3.66)          | 3.16 (2.33-4.00)          | 0.636        | 0.022; 0.614 |
| Vit-B6 (mg)           | 1.00 (1.00-1.66)          | 1.00 (0.41-1.33)          | 0.173        | 0.027; 0.328 |
| Total Folate (mcg)    | 209.83 (159.33-264.83)    | 243.33 (189.16-373.33)    | 0.282        | 0.027; 0.378 |
| Folate, DFE (mcg DFE) | 260.33 (190.08-330.00)    | 281.00 (227.58-434.41)    | 0.258        | 0.026; 0.422 |
| Vit-B12 (mcg)         | 3.33 (2.41-4.50)          | 3.50 (2.00-4.66)          | 0.890        | 0.027; 0.325 |
| Vit-H (mcg)           | 0.00 (0.00-1.83)          | 0.00 *                    | <b>0.011</b> | 0.037; 0.037 |
| Vit-C (mg)            | 44.66 (7.50-58.58)        | 72.83 (26.58-141.33)      | 0.055        | 0.027; 0.290 |
| Vit-D (IU)            | 23.50 (11.83-44.08)       | 108.66 (51.25-183.08)     | <b>0.001</b> | 0.045; 0.016 |
| Vit-E (IU)            | 2.33 (1.33-3.58)          | 3.83 (2.16-7.16)          | <b>0.022</b> | 0.021; 0.716 |
| Vit-K1 (mcg)          | 39.00 (21.08-54.75)       | 23.33 (12.75-35.08)       | 0.090        | 0.030; 0.187 |

Significant ( $p < 0.05$ ) events are highlighted in bold.

\*Absolute number means that the estimative of ingestion was constant for all the subjects of the group.

<sup>1</sup>Mann-Whitney U test

<sup>2</sup>Bray-Curtis
