# Supplementary material for: Hepatic glycogen storage diseases are associated to microbial dysbiosis
Source: PubMed Central journal article supplement (PMC6445422; doi:10.1371/journal.pone.0214582), 2019-04-02
Supplement: pone.0214582.s002.pdf [file pone.0214582.s002.pdf]

**S2 Table. Summary of the finding of the GSD patients (n= 24).**

| Variables <sup>†</sup>                          | GSD Ia<br>(n=15)          | GSD Ib<br>(n=5)                                                          | p-value <sup>†</sup> | GSD III<br>(n=1) | GSD Ixα<br>(n=3) |
|-------------------------------------------------|---------------------------|--------------------------------------------------------------------------|----------------------|------------------|------------------|
| Sex (M/F)                                       | 6/8                       | 3/2                                                                      | 1.00                 | 1/0              | 3/0 <sup>2</sup> |
| Age (yr)                                        | 13 (10-20)                | 10 (4.0-23.5)                                                            | 0.405                | 16               | 11-29            |
| Faecal pH                                       | 5.97(5.38-6.80)           | 5.98 (4.82-6.58)                                                         | 0.727                | 7.98             | 7.18-7.60        |
| Inflammatory Bowel Disease<br>(yes/no)          | 0/15                      | 4/1                                                                      | 0.116                | 0/1              | 0/3              |
| Abdominal pain complaint<br>(yes/no)            | 5/10                      | 4/1                                                                      | 0.127                | 0/1              | 0/3              |
| Nutritional status<br>(Obese+Overweight/Normal) | 12/3                      | 5/0                                                                      | 0.539                | 1/0              | 0/3              |
| Calprotectin (µg/g)                             | 108.20(65.58-186.30)      | On mezalazine= (45.2-285.5) <sup>†</sup><br>No mezalazine= (20.65-44.36) | -                    | 61.58            | 20.18-143.90     |
| Number of OTUs                                  | 166.00 (116-208)          | On mezalazine= (51-204) <sup>†</sup><br>No mezalazine= (61-85)           | 0.896                | 176              | 290-465          |
| Daily Intake                                    |                           |                                                                          |                      |                  |                  |
| -Total Kcal                                     | 2315.33 (2103.66-2883.33) | 2124.66 (1820.33-2795.00)                                                | 0.407                | 2878.33          | 1668.66-2400     |
| -Total Kcal/kg                                  | 39.30 (34.05-51.44)       | 58 (33.56-81.01)                                                         | 0.315                | 36.43            | 40.68-63.06      |
| -Total Kcal (from carbohydrate)                 | 1662.33 (1514.33-2129.33) | 1565.33 (1219.83-1951.00)                                                | 0.239                | 1900.33          | 935.66-1368.00   |
| -Kcal from diet                                 | 387.92(211.42-626.27)     | 362.81 (197.39-447.57)                                                   | 0.694                | 684.70           | 380.57-1022.22   |
| -Kcal from UCCS                                 | 1300 (1108.44-1766.72)    | 1153.18 (947.90-1576.52)                                                 | 0.407                | 1215.62          | 345.80-951.43    |
| -Total Carbohydrate (g)                         | 406.33 (374.33-527.00)    | 382.66 (303.00-480.16)                                                   | 0.315                | 473.66           | 242.00-360.00    |
| -Diet Carbohydrates (g)                         | 94.66 (52.33-155.00)      | 89.66 (48.91-109.83)                                                     | 0.694                | 170.66           | 94.00-269.00     |
| -UCCS Carbohydrate (g)                          | 321.66 (274.0-431.66)     | 285.00 (234.00-388.00)                                                   | 0.359                | 303.00           | 91.00-235.00     |
| -Protein (g/day)                                | 71 (55-76.66)             | 70.33 (55.83-107.33)                                                     | 0.896                | 102.33           | 56.67-101        |
| -Fats (g/day)                                   | 30.00 (22.00-47.66)       | 34 (29.0-48.83)                                                          | 0.513                | 54.33            | 40.67-62.67      |
| Drugs (yes/no)                                  |                           |                                                                          |                      |                  |                  |
| -Allopurinol                                    | 3/12                      | 1/4                                                                      | 1.000                | 0/1              | 0/3              |
| -Antibiotic usage (Last 6<br>months)            | 5/10                      | 4/1                                                                      | 0.127                | 1/0              | 0/3              |
| -ACE inhibitor                                  | 10/5                      | 1/4                                                                      | 0.127                | 0/1              | 0/3              |
| -Filgrastim (G-CSF)                             | 0/15                      | 5/0                                                                      | <b>0.000</b>         | 0/1              | 0/3              |

|                         |      |     |              |     |     |
|-------------------------|------|-----|--------------|-----|-----|
| -Mesalazine             | 0/15 | 3/2 | <b>0.009</b> | 0/1 | 0/3 |
| -Multivitamin           | 15/0 | 5/0 | -            | 1/0 | 1/2 |
| -Potassium Citrate      | 3/12 | 0/5 | 0.539        | 0/1 | 0/3 |
| -Proton Pump Inhibitors | 1/14 | 1/4 | 0.447        | 0/1 | 0/3 |
| -Statins                | 1/14 | 0/5 | 1.000        | 0/1 | 0/3 |

---

OTU: operational taxonomic unit; UCCS: uncooked cornstarch; ACE: Angiotensin-converting-enzyme inhibitor (enalapril maleate); G-CSF: G-colony stimulating factor.

<sup>1</sup> Numeric variables were reported as Median (Q1-Q3) for GSD Ia and Ib and as Min- Max for GSD III and IXα. Qualitative variables were reported as absolute numbers. P-value was assessed to differences between the groups Ia and Ib.

<sup>†</sup>Calprotectin and number of OTUs for patients on and without mesalazine were reported as Min-Max.
