# Supplementary material for: Hepatic glycogen storage diseases are associated to microbial dysbiosis
Source: PubMed Central journal article supplement (PMC6445422; doi:10.1371/journal.pone.0214582), 2019-04-02
Supplement: pone.0214582.s003.pdf [file pone.0214582.s003.pdf]

**S3 Table. Overall description of the 16S rRNA sequencing results among subjects.**

| <b>Subject ID</b>   | <b>Number of sequences</b> | <b>Coverage</b> | <b>Observed OTUs</b> |
|---------------------|----------------------------|-----------------|----------------------|
| <b>Controls</b>     |                            |                 |                      |
| C01                 | 46,350                     | 0.999           | 236                  |
| C02                 | 49,504                     | 0.999           | 231                  |
| C03                 | 55,620                     | 0.998           | 384                  |
| C04                 | 44,692                     | 0.999           | 311                  |
| C05                 | 54,335                     | 0.999           | 246                  |
| C06                 | 49,219                     | 0.998           | 341                  |
| C07                 | 41,513                     | 0.998           | 390                  |
| C08                 | 58,964                     | 0.999           | 274                  |
| C09                 | 53,734                     | 0.998           | 397                  |
| C10                 | 40,401                     | 0.998           | 335                  |
| C11                 | 53,303                     | 0.998           | 419                  |
| C12                 | 31,736                     | 0.998           | 205                  |
| C13                 | 27,531                     | 0.996           | 437                  |
| C14                 | 23,019                     | 0.998           | 229                  |
| C15                 | 29,800                     | 0.998           | 270                  |
| C16                 | 17,115                     | 0.994           | 444                  |
| <b>GSD Patients</b> |                            |                 |                      |
| P01                 | 4,724                      | 0.996           | 51                   |
| P02                 | 50,598                     | 0.999           | 169                  |
| P03                 | 44,874                     | 0.999           | 116                  |
| P04                 | 55,299                     | 0.999           | 166                  |
| P05                 | 47,966                     | 0.999           | 176                  |
| P06                 | 20,813                     | 0.997           | 165                  |
| P07                 | 62,846                     | 0.999           | 85                   |
| P08                 | 47,637                     | 0.998           | 239                  |
| P09                 | 39,881                     | 0.999           | 105                  |
| P10                 | 58,674                     | 0.999           | 138                  |
| P11                 | 57,637                     | 0.999           | 204                  |
| P12                 | 59,176                     | 0.999           | 208                  |
| P13                 | 46,914                     | 0.999           | 175                  |
| P14                 | 49,816                     | 0.998           | 465                  |
| P15                 | 68,350                     | 0.999           | 152                  |
| P16                 | 52,118                     | 0.999           | 61                   |
| P17                 | 61,156                     | 0.999           | 289                  |
| P18                 | 58,165                     | 0.999           | 394                  |
| P19                 | 67,259                     | 0.999           | 290                  |
| P20                 | 29,024                     | 0.999           | 85                   |
| P21                 | 37,878                     | 0.999           | 81                   |
| P22                 | 11,018                     | 0.995           | 155                  |
| P23                 | 42,914                     | 0.998           | 184                  |
| P24                 | 35,009                     | 0.998           | 266                  |
